# Supplementary material
Source: PubMed Central journal article supplement (PMC3024791)
Supplement: supp_M110.163097_jbc.M110.163097-4.pdf [file supp_M110.163097_jbc.M110.163097-4.pdf]

Supplementary Table 1

| Residue# | $\Pi O_2$ | $\Pi CrOx$ | $\Phi$ | $\delta^-$ |
|----------|-----------|------------|--------|------------|
| 6        | 0.22      | 0.63       | -1.07  | 0.32       |
| 7        | 0.22      | 0.18       | 0.18   | 0.29       |
| 8        | 0.25      | 0.43       | -0.54  | 0.34       |
| 9        | 0.18      | 0.96       | -1.69  | 0.31       |
| 10       | 0.18      | 0.59       | -1.17  | 0.35       |
| 11       | 0.23      | 0.27       | -0.20  | 0.25       |
| 12       | 0.16      | 0.25       | -0.47  | 0.23       |
| 13       | 0.14      | 1.63       | -2.48  | 0.39       |
| 14       | 0.27      | 0.92       | -1.24  | 0.28       |
| 15       | 0.40      | 0.15       | 0.98   | 0.28       |
| 16       | 0.16      | 0.27       | -0.54  | 0.25       |
| 17       | 0.03      | 0.43       | -2.69  | 0.26       |
| 18       | 0.23      | 0.06       | 1.37   | 0.25       |
| 19       | 0.28      | 0.13       | 0.75   | 0.23       |
| 20       | 0.15      | 0.39       | -1.00  | 0.27       |
| 21       | 0.26      | 1.14       | -1.47  | 0.26       |
| 22       | 0.30      | 0.07       | 1.44   | 0.26       |
| 23       | 0.32      | 0.11       | 1.08   | 0.23       |
| 24       | 0.25      | 1.70       | -1.92  | 0.39       |
| 25       | 0.15      | 0.15       | 0.00   | 0.25       |
| 26       | 0.31      | 0.10       | 1.17   | 0.24       |
| 27       | 0.14      | 0.41       | -1.11  | 0.35       |
| 28       | 0.27      | 3.42       | -2.53  | 0.34       |
| 29       | 0.28      | 0.29       | -0.04  | 0.27       |
| 30       | 0.19      | 0.09       | 0.81   | 0.27       |
| 31       | 0.27      | 2.12       | -2.08  | 0.37       |
| 32       | 0.16      | 1.14       | -1.99  | 0.26       |
| 33       | 0.18      | 0.09       | 0.69   | 0.26       |
| 34       | 0.17      | 0.44       | -0.96  | 0.24       |
| 35       | 0.24      | 0.58       | -0.89  | 0.38       |
| 36       | 0.16      | 0.41       | -0.97  | 0.28       |

  

| Residue# | $\Pi O_2$ | $\Pi CrOx$ | $\Phi$ | $\delta^-$ |
|----------|-----------|------------|--------|------------|
| 37       | 0.16      | 0.26       | -0.50  | 0.26       |
| 38       | 0.21      | 0.40       | -0.63  | 0.29       |
| 39       | 0.21      | 0.18       | 0.16   | 0.26       |
| 40       | 0.18      | 0.42       | -0.83  | 0.30       |
| 41       | 0.11      | 0.70       | -1.82  | 0.25       |
| 42       | 0.18      | 0.38       | -0.74  | 0.25       |
| 43       | 0.14      | 0.77       | -1.73  | 0.28       |
| 44       | 0.16      | 0.08       | 0.65   | 0.30       |
| 45       | 0.24      | 0.47       | -0.67  | 0.26       |
| 46       | 0.20      | 0.07       | 1.11   | 0.25       |
| 47       | 0.03      | 0.26       | -2.30  | 0.28       |
| 48       | 0.20      | 0.17       | 0.14   | 0.28       |
| 49       | 0.20      | 0.15       | 0.29   | 0.28       |
| 50       | 0.17      | 0.08       | 0.82   | 0.25       |
| 51       | 0.18      | 0.26       | -0.38  | 0.29       |
| 52       | 0.16      | 1.96       | -2.49  | 0.28       |
| 53       | 0.06      | 0.08       | -0.25  | 0.24       |
| 54       | 0.03      | 0.24       | -2.01  | 0.28       |
| 55       | 0.23      | 0.81       | -1.25  | 0.36       |
| 56       | 0.19      | 0.94       | -1.60  | 0.27       |
| 57       | 0.16      | 0.06       | 0.97   | 0.22       |
| 58       | 0.14      | 1.76       | -2.57  | 0.25       |
| 59       | 0.17      | 1.47       | -2.14  | 0.31       |
| 60       | 0.17      | 0.71       | -1.41  | 0.24       |
| 61       | 0.24      | 0.04       | 1.90   | 0.27       |
| 62       | 0.21      | 0.53       | -0.91  | 0.38       |
| 63       | 0.15      | 0.79       | -1.68  | 0.26       |
| 64       | 0.18      | 0.21       | -0.15  | 0.24       |
| 65       | 0.28      | 0.44       | -0.46  | 0.27       |
| 66       | 0.16      | 0.90       | -1.73  | 0.30       |
| 67       | 0.14      | 0.53       | -1.37  | 0.23       |

  

| Residue# | $\Pi O_2$ | $\Pi CrOx$ | $\Phi$ | $\delta^-$ |
|----------|-----------|------------|--------|------------|
| 68       | 0.20      | 0.11       | 0.55   | 0.28       |
| 69       | 0.13      | 0.89       | -1.93  | 0.24       |
| 70       | 0.17      | 1.89       | -2.39  | 0.28       |
| 71       | 0.16      | 0.13       | 0.24   | 0.22       |
| 72       | 0.04      | 0.07       | -0.49  | 0.24       |
| 73       | 0.22      | 2.86       | -2.56  | 0.35       |
| 74       | 0.15      | 0.09       | 0.48   | 0.18       |
| 75       | 0.22      | 0.06       | 1.20   | 0.21       |
| 76       | 0.19      | 0.22       | -0.15  | 0.25       |
| 77       | 0.17      | 1.85       | -2.41  | 0.33       |
| 78       | 0.17      | 0.17       | 0.01   | 0.23       |
| 79       | 0.15      | 0.17       | -0.13  | 0.21       |
| 80       | 0.20      | 0.91       | -1.54  | 0.34       |
| 81       | 0.14      | 2.44       | -2.82  | 0.30       |
| 82       | 0.27      | 0.60       | -0.79  | 0.31       |
| 83       | 0.19      | 0.08       | 0.82   | 0.28       |
| 84       | 0.21      | 2.36       | -2.42  | 0.36       |
| 85       | 0.14      | 0.77       | -1.70  | 0.29       |
| 86       | 0.17      | 0.18       | -0.03  | 0.22       |
| 87       | 0.16      | 1.50       | -2.25  | 0.25       |
| 88       | 0.23      | 2.33       | -2.30  | 0.29       |
| 89       | 0.22      | 0.13       | 0.47   | 0.23       |
| 90       | 0.08      | 0.13       | -0.49  | 0.25       |
| 91       | 0.18      | 1.73       | -2.24  | 0.25       |
| 92       | 0.06      | 1.23       | -3.10  | 0.32       |
| 93       | 0.18      | 0.10       | 0.56   | 0.26       |
| 94       | 0.22      | 0.65       | -1.06  | 0.31       |
| 95       | 0.10      | 1.75       | -2.88  | 0.43       |
| 96       | 0.18      | 0.58       | -1.16  | 0.35       |
| 97       | 0.14      | 0.23       | -0.48  | 0.24       |
| 98       | 0.22      | 0.64       | -1.08  | 0.28       |
