# Supplementary material
Source: PubMed Central journal article supplement (PMC3024791)

Supplemental Figure 1

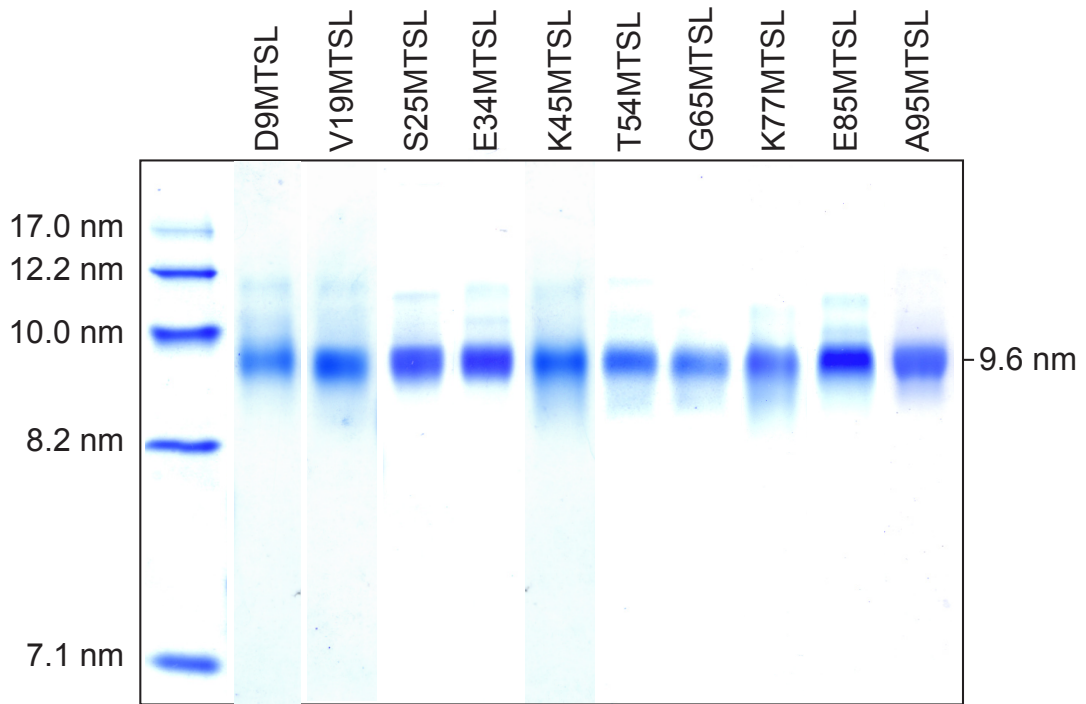

Supplement: supp_M110.163097_jbc.M110.163097-2.pdf [file supp_M110.163097_jbc.M110.163097-2.pdf]

Supplementary figure 2

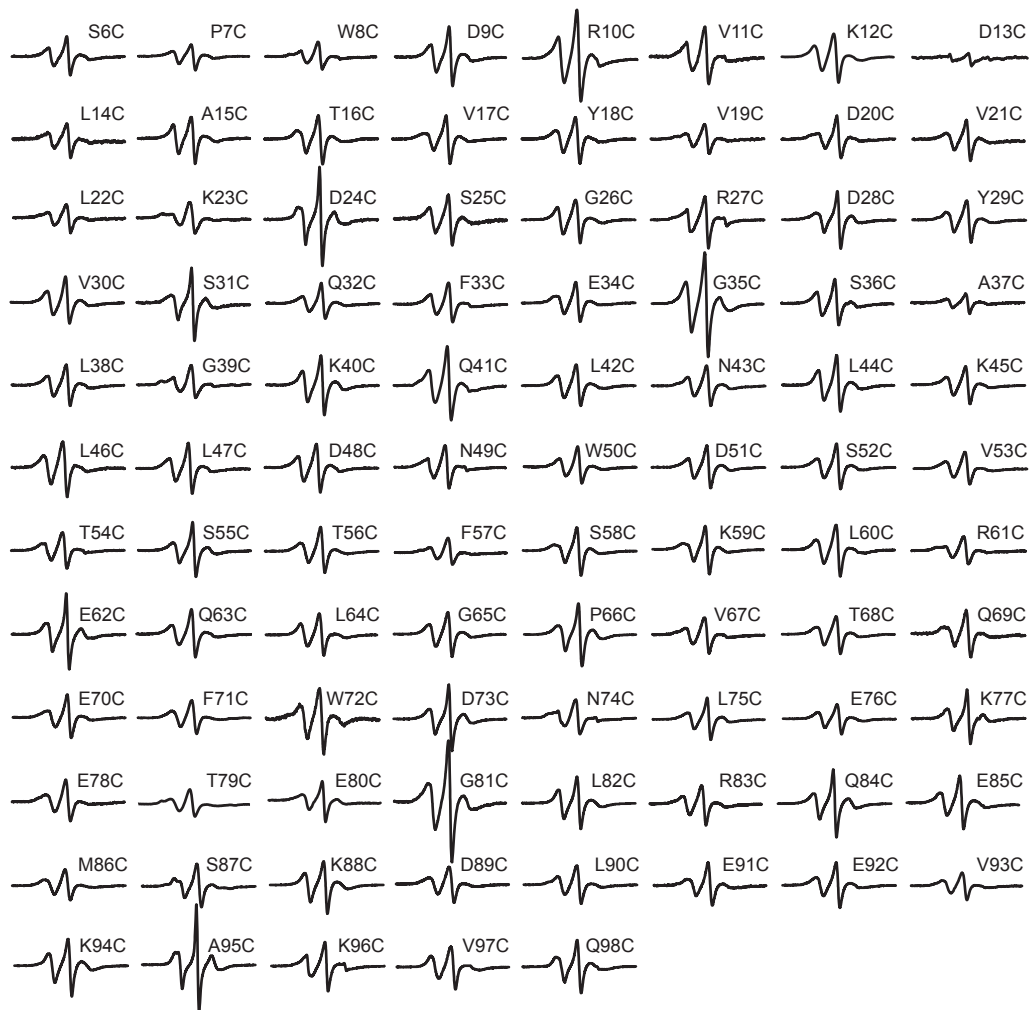

Supplement: supp_M110.163097_jbc.M110.163097-3.pdf [file supp_M110.163097_jbc.M110.163097-3.pdf]
